# Supplementary material for: The field evaluation of a push-pull system to control malaria vectors in Northern Belize, Central America
Source: Springer Nature journal article supplement (doi:10.1186/s12936-015-0692-5), 2015-04-28
Supplement: MOESM2 [file 9761260]

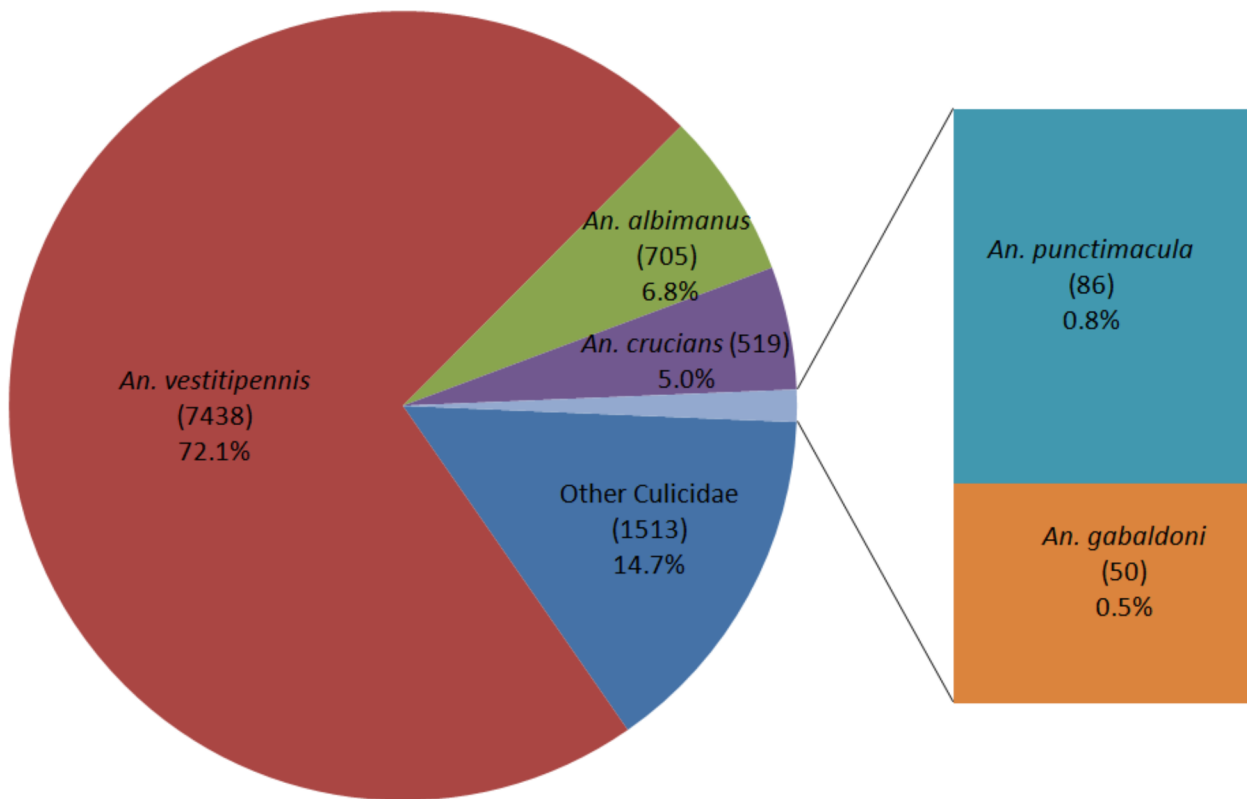

Total Collected = 10,311
